# Supplementary material for: Production of γ-butyrolactone from biomass-derived 1,4-butanediol over novel copper-silica nanocomposite
Source: Royal Society of Chemistry journal article supplement (doi:10.1039/c1gc15261k), 2011-01-01
Supplement: c1gc15261k.pdf [file c1gc15261k.pdf]

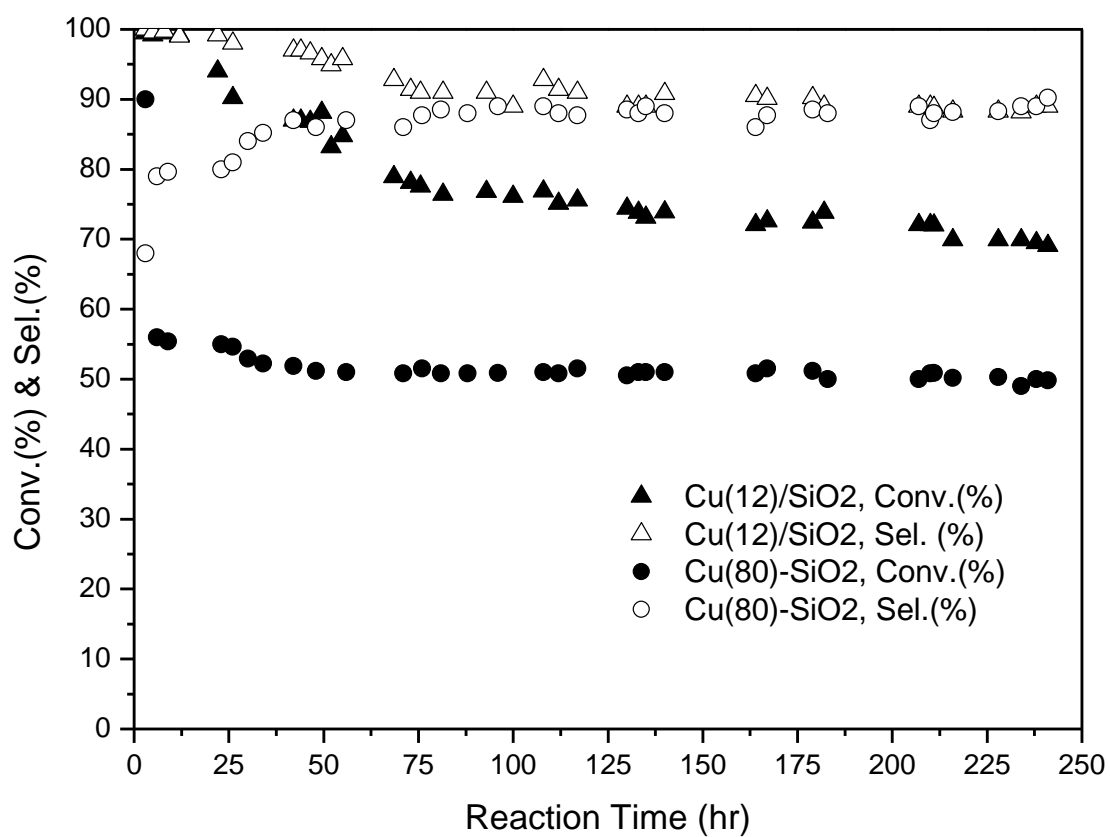

**Fig. S1.** Changes in BDO conversion and selectivity to GBL with reaction time over 0.15g of Cu(80)-SiO<sub>2</sub> and 1.0g of Cu(12)/SiO<sub>2</sub> at 250°C and 1 atm. Reaction conditions: BDO feed rate, 2.0 cm<sup>3</sup>/hr; N<sub>2</sub> carrier gas flow rate, 45 cm<sup>3</sup>/min.

**Table S1. Cu Surface Area of Copper-Silica Catalyst**

| Catalyst                        | Cu Surface Area               |                         |
|---------------------------------|-------------------------------|-------------------------|
|                                 | Cu m <sup>2</sup> /g catalyst | Cu m <sup>2</sup> /g Cu |
| Cu(12)/SiO <sub>2</sub> (Fresh) | 3.9                           | 32.5                    |
| Cu(12)/SiO <sub>2</sub> (used)  | 0.9                           | 7.5                     |
| Cu(80)-SiO <sub>2</sub> (Fresh) | 5.9                           | 7.4                     |
| Cu(80)-SiO <sub>2</sub> (used)  | 3.1                           | 3.9                     |

The metallic copper surface area was determined by the nitrous oxide (N<sub>2</sub>O) titration method for all the samples. The samples were reduced at 300 °C using 10% H<sub>2</sub> in inert gas. And then Pure 10% N<sub>2</sub>O with a flow rate of 60 ml/min was allowed to pass over the sample at 60°C for 2 h. It was assumed that only the surface copper was oxidized to Cu<sub>2</sub>O under these conditions by the surface reaction, N<sub>2</sub>O(g) + 2Cu<sup>0</sup>(s) → (Cu–O–Cu)(s) + N<sub>2</sub>(g). The copper surface area of the catalyst was determined from the amount of N<sub>2</sub>O consumed, which was analyzed with a thermal conductivity detector (TCD). The experimental error in Cu surface areas was about 5% using this technique.
